# Supplementary material for: Development of an aptasensor for dibutyl phthalate detection and the elucidation of assay inhibition factors
Source: Royal Society of Chemistry journal article supplement (doi:10.1039/d4ra03045a), 2024-01-01
Supplement: d4ra03045a1.pdf [file d4ra03045a1.pdf]

*Supplementary Information*

**Development of aptasensor for dibutyl phthalate detection and the elucidation of assay  
inhibition factors**

*Hyerin Song, Hyun Jeong Lim, and \*Ahjeong Son*

Department of Environmental Science and Engineering, Ewha Womans University, Seoul  
03760, Republic of Korea

\*Corresponding Author (A. Son): 52 Ewhayeodae-gil, Seodaemun-gu, Ewha Womans  
University, Seoul 03760, Republic of Korea; E-mail. [ason@ewha.ac.kr](mailto:ason@ewha.ac.kr),  
[ahjeong.son@gmail.com](mailto:ahjeong.son@gmail.com); Phone. +82 (2) 3277-3339

## LIST OF FIGURES & TABLES

**Figure S1.** (a) The fluorescence intensities depending on various combinations with aptamer, probe, SYBR Green I, and DBP. (b) Comparison of fluorescence intensity between aptamer and truncated aptamer.

**Figure S2.** Decrease ratio in the experiments based on time.

**Table S1.** List of compounds that were used for the selectivity verification

**Table S2.** *P*-values (t-test) for selectivity of SG-aptasensor

**Table S3.** *P*-values (t-test) for temperature experiment of SG-aptasensor

**Table S4.** Studies for the existence of PAEs in various environmental matrixes.

**Table S5.** List of precision (%RSD, Relative Standard Deviation)

**Table S6.** % inhibition for Figure 5

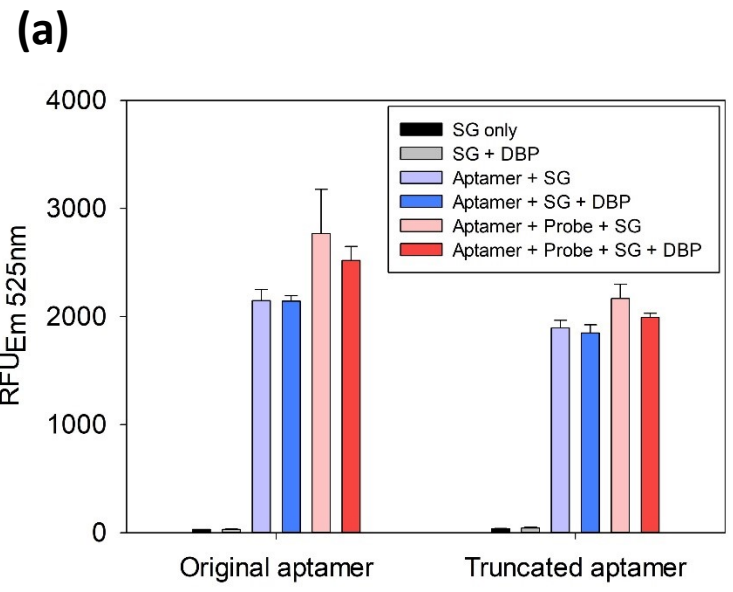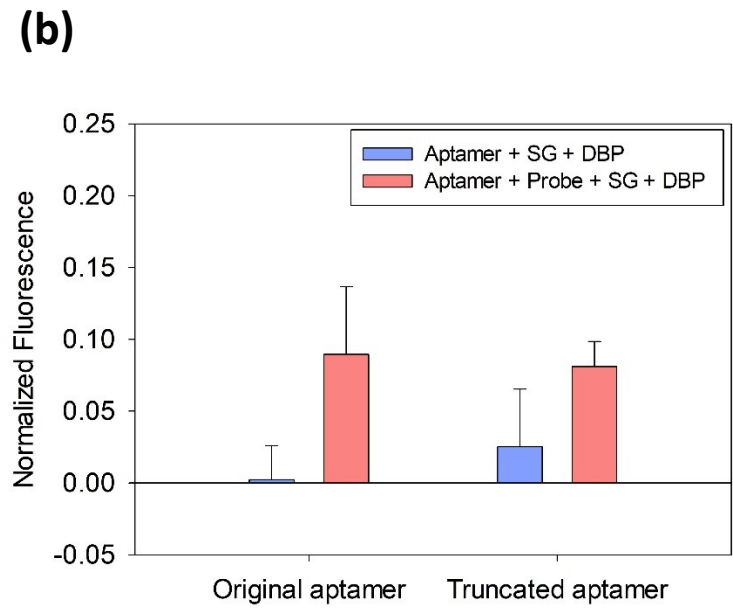

**Figure S1**

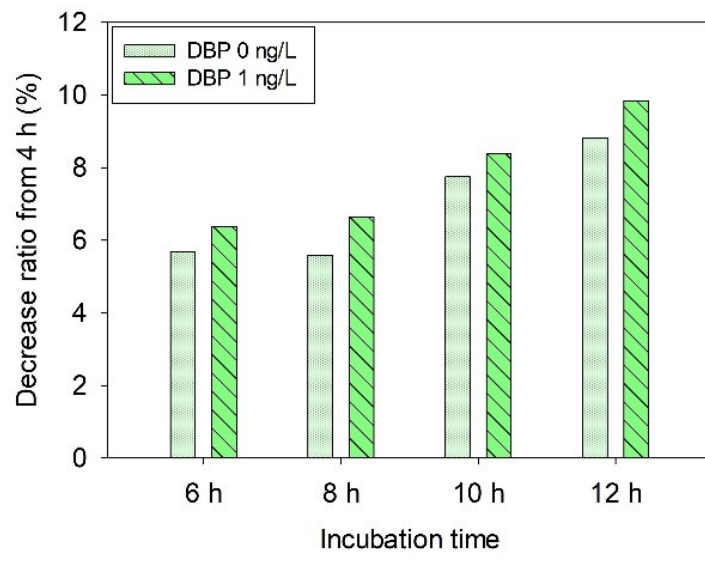

**Figure S2**

| Name (Abbr.)                  | Molecular structure                                                               | Chemical formula           | M.W                                      | Solubility in water    |
|-------------------------------|-----------------------------------------------------------------------------------|----------------------------|------------------------------------------|------------------------|
| Dibutyl phthalate (DBP)       | 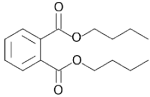 | $C_{16}H_{22}O_4$          | 278.348 g/mol                            | 13 mg/L<br>(20°C)      |
| Nonylphenol ethoxylate (NPE)* |  | $C_{15}H_{24}O(C_2H_4O)_n$ | 1,980 g/mol<br>(70% in H <sub>2</sub> O) | 0.025 mg/L<br>(25°C)   |
| Triclosan (TCS)               |  | $C_{12}H_7Cl_3O_2$         | 289.50 g/mol                             | 10 mg/L<br>(20°C)      |
| Bisphenol A (BPA)             |  | $C_{15}H_{16}Cl_2$         | 228.291 g/mol                            | 120-300 mg/L<br>(25°C) |
| Bisphenol S (BPS)             |  | $C_{12}H_{10}O_4S$         | 250.27 g/mol                             | 1100 mg/L<br>(25°C)    |

**Table S1.** List of compounds that were used for the selectivity verification

\* Tergitol-type NP-40 (nonyl phenoxy polyethoxy ethanol)

**Table S2.** *P*-values (t-test) for selectivity of SG-aptasensor

| Concentration     | DBP           | NPE   | TCS   | BPA   | BPS   |
|-------------------|---------------|-------|-------|-------|-------|
| 0 ng/L and 1 ng/L | <b>0.0058</b> | 0.274 | 0.204 | 0.259 | 0.488 |

**Table S3.** *P*-values (t-test) for temperature experiment of SG-aptasensor

| Temperature | 2 °C          | 13 °C        | 25 °C          | 37 °C          |
|-------------|---------------|--------------|----------------|----------------|
| 2 °C        |               | 0.116        | 0.229          | <b>0.0005</b>  |
| 13 °C       | 0.116         |              | 0.258          | <b>0.008</b>   |
| 25 °C       | 0.229         | 0.258        |                | <b>0.00004</b> |
| 37 °C       | <b>0.0005</b> | <b>0.008</b> | <b>0.00004</b> |                |

**Table S4.** Studies for the existence of PAEs in various environmental matrixes.

| <b>Matrix</b>               | <b>Location</b>                                          | <b>PAEs</b> | <b>Concentration<br/>(<math>\mu\text{g/L}</math>, ppb)</b> | <b>References</b>                      |
|-----------------------------|----------------------------------------------------------|-------------|------------------------------------------------------------|----------------------------------------|
| <b>Water</b>                | Lake in Guangzhou city<br>(China)                        | DBP         | 2.03                                                       | (Zeng et al.<br>2008)                  |
|                             |                                                          | DIBP        | 0.47                                                       |                                        |
|                             |                                                          | DEHP        | 0.24                                                       |                                        |
| <b>Water</b>                | Manzanares and Jarama<br>river<br>(Spain)                | DBP         | 0.82                                                       | (Domínguez-<br>Morueco et al.<br>2014) |
|                             |                                                          | DBP         | 6.8                                                        |                                        |
|                             |                                                          | DEP         | 0.63                                                       |                                        |
| <b>Water</b>                | Surface water in Northern<br>industrial area<br>(Sweden) | DMP         | 0.40                                                       | (Bastos et al.<br>2012)                |
|                             |                                                          | BBP         | 0.17                                                       |                                        |
|                             |                                                          | DEHP        | 0.22                                                       |                                        |
| <b>Soil or<br/>sediment</b> | Agricultural paddy soils in<br>Sanjiang Plain<br>(China) | DBP         | 0.16                                                       | (Wang et al.<br>2017)                  |
|                             |                                                          | DEP         | 0.06                                                       |                                        |
|                             |                                                          | DBP         | 750                                                        |                                        |
| <b>Air</b>                  | Urban home<br>(Japan)                                    | DEHP        | 320                                                        | (Otake et al.<br>2004)                 |
|                             |                                                          | DEP         | 140                                                        |                                        |
|                             |                                                          | DCHP        | 120                                                        |                                        |
|                             |                                                          | BBP         | 20                                                         |                                        |
|                             |                                                          | DEP         | 45                                                         |                                        |
| <b>Air</b>                  | California county<br>(USA)                               | DIBP        | 44.5                                                       | (Lunderberg et<br>al. 2019)            |
|                             |                                                          | DBP         | 31.5                                                       |                                        |
|                             |                                                          | DEHP        | 3.65                                                       |                                        |

**Table S5.** List of precision (%RSD, Relative Standard Deviation)

**Sensitivity (Figure 2B)**

| <b>DBP concentration<br/>(ng/L)</b> | <b>Fluorescence intensity</b> | <b>Normalized fluorescence intensity</b> |
|-------------------------------------|-------------------------------|------------------------------------------|
| 0                                   | 3.3                           |                                          |
| 0.1                                 | 1.9                           | 60.3                                     |
| 0.5                                 | 0.5                           | 11.1                                     |
| 1                                   | 0.6                           | 7.4                                      |
| 5                                   | 1.0                           | 10.8                                     |
| 10                                  | 2.4                           | 22.3                                     |
| 50                                  | 0.7                           | 6.4                                      |
| 100                                 | 5.1                           | 26.5                                     |

**Table S6.** % inhibition for Figure 5

| <b>Ions</b>            | <b>Fs Conc.<br/>(mM)</b> | <b>DBP 0 ng/L</b> | <b>DBP 1 ng/L</b> |
|------------------------|--------------------------|-------------------|-------------------|
| <b>Mg<sup>2+</sup></b> | 0.01 mM                  | 1.17%             | -0.77%            |
|                        | 0.1 mM                   | 1.31%             | 3.42%             |
|                        | 1 mM                     | -1.64%            | 2.94%             |
|                        | 10 mM                    | -4.07%            | -0.88%            |
|                        | 100 mM                   | 5.29%             | 13.43%            |
| <b>Ca<sup>2+</sup></b> | 0.01 mM                  | 10.64%            | 10.07%            |
|                        | 0.1 mM                   | 12.85%            | 5.22%             |
|                        | 1 mM                     | 14.99%            | 12.06%            |
|                        | 10 mM                    | 10.77%            | 9.02%             |
|                        | 100 mM                   | 3.05%             | 2.45%             |
| <b>Cu<sup>2+</sup></b> | 0.01 mM                  | 3.35%             | 4.26%             |
|                        | 0.1 mM                   | 12.00%            | 9.80%             |
|                        | 1 mM                     | 19.72%            | 20.96%            |
|                        | 10 mM                    | 59.68%            | 62.84%            |
|                        | 100 mM                   | 99.06%            | 98.82%            |

Note) % Inhibition =  $(F_c - F_s)/F_c * 100$ ,  $F_c = 0$  mM



## References

- (1) Feng Zeng, Kunyan Cui, Zhiyong Xie, Min Liu, Yangjie Li, Yujun Lin, Zunxiang Zeng, Fangbai Li. "Occurrence of phthalate esters in water and sediment of urban lakes in a subtropical city, Guangzhou, South China." *Environment International* 34.3 (2008): 372-380.
- (2) N. Domínguez-Morueco, S. González-Alonso, and Y. Valcárcel. "Phthalate occurrence in rivers and tap water from central Spain." *Science of the total environment* 500 (2014): 139-146.
- (2) Patricia Moreira Bastos, and Peter Haglund. "The use of comprehensive two-dimensional gas chromatography and structure–activity modeling for screening and preliminary risk assessment of organic contaminants in soil, sediment, and surface water." *Journal of Soils and Sediments* 12 (2012): 1079-1088.
- (4) He Wang, Hong Liang, and Da-Wen Gao. "Occurrence and risk assessment of phthalate esters (PAEs) in agricultural soils of the Sanjiang Plain, northeast China." *Environmental Science and Pollution Research* 24 (2017): 19723-19732.
- (5) Takamitsu Otake, Jun Yoshinaga, and Yukio Yanagisawa. "Exposure to phthalate esters from indoor environment." *Journal of Exposure Science & Environmental Epidemiology* 14.7 (2004): 524-528.
- (6) David M. Lunderberg\*, Kasper Kristensen, Yingjun Liu, Pawel K. Misztal, Yilin Tian, Caleb Arata, Rebecca Wernis, Nathan Kreisberg, William W. Nazaroff, and Allen H. Goldstein. "Characterizing airborne phthalate concentrations and dynamics in a normally occupied residence." *Environmental science & technology* 53.13 (2019): 7337-7346.
